# Supplementary material
Source: PubMed Central journal article supplement (PMC3630362)

Fig. 1A Source Data

Low Middle High

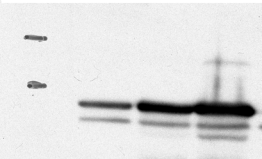

Supplement: emboj201366df1a.pdf [file emboj201366df1a.pdf]

Fig. 2A Source Data

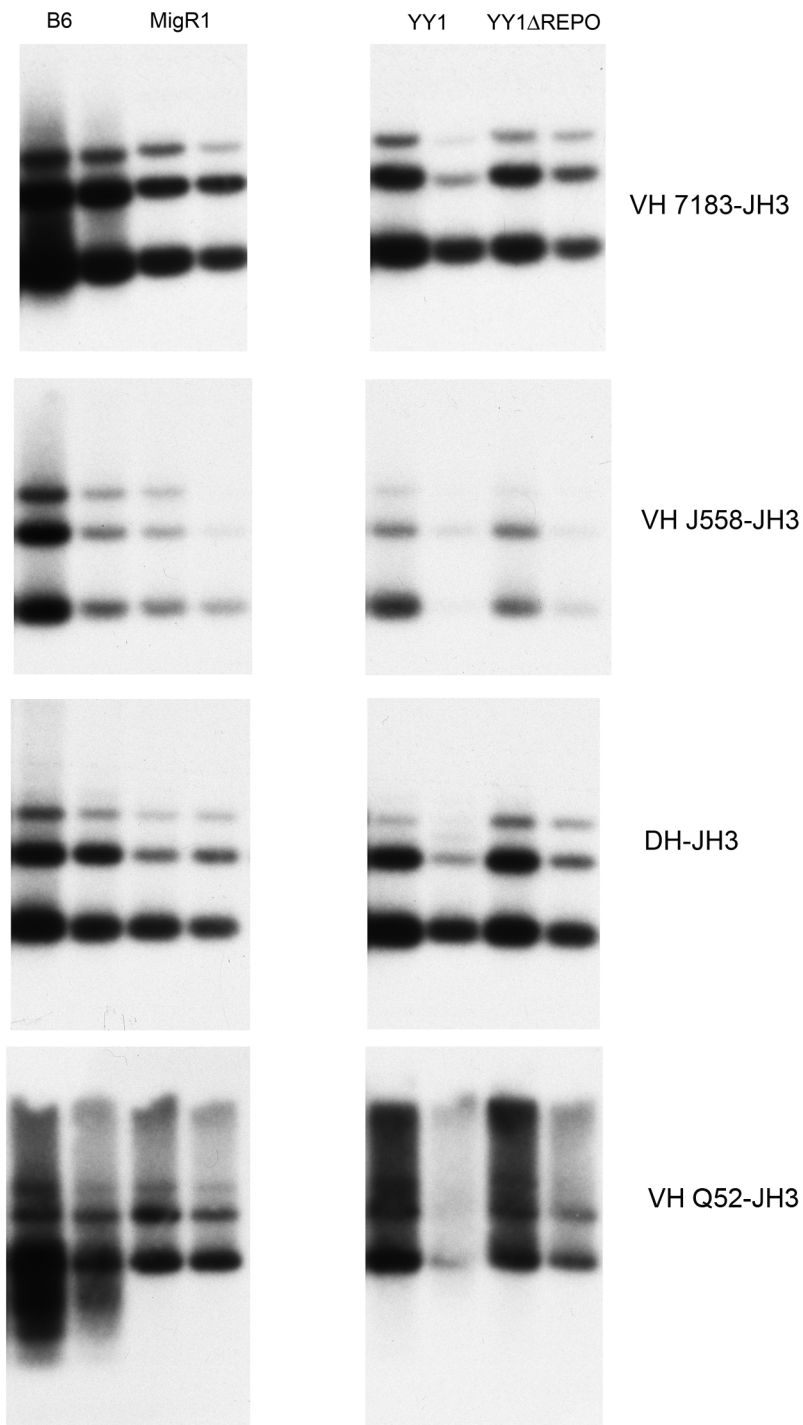

Supplement: emboj201366df2a.pdf [file emboj201366df2a.pdf]

Figure 5B IL7 B cell source data

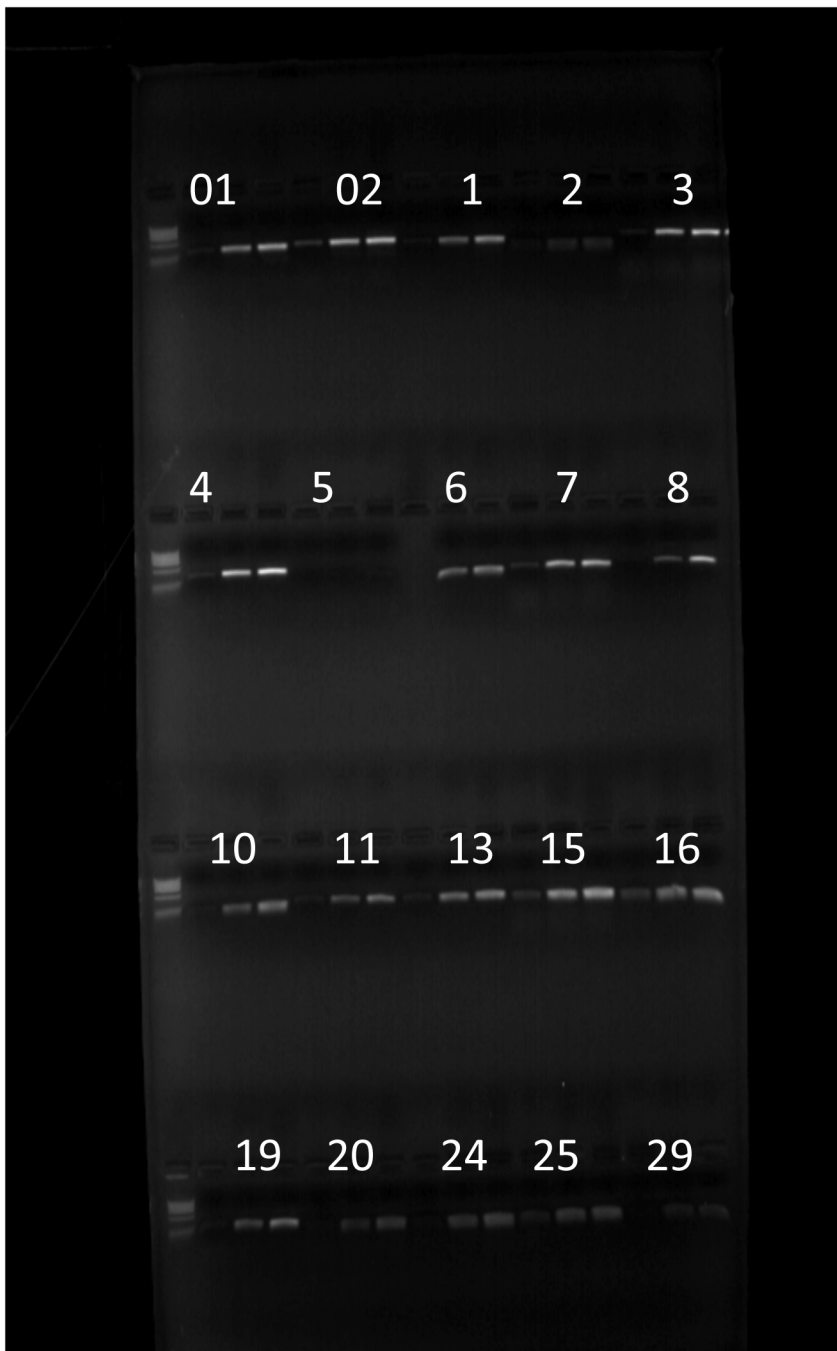

Supplement: emboj201366df5b.pdf [file emboj201366df5b.pdf]

Fig. 8A Source Data

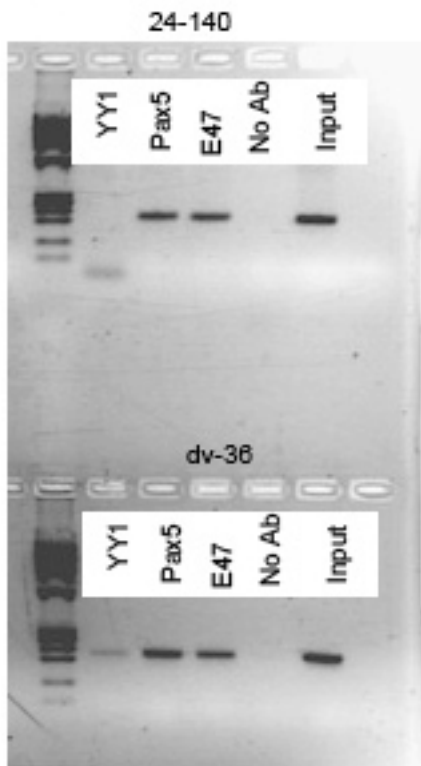

Supplement: emboj201366df8a.pdf [file emboj201366df8a.pdf]
